# Supplementary material for: Tissue Distribution and Metabolization of Ciguatoxins in an Herbivorous Fish following Experimental Dietary Exposure to Gambierdiscus polynesiensis
Source: MDPI journal article supplement (doi:10.3390/md22010014), 2023-12-25
Supplement: s1 [file s1]

---

Supplementary materials:

## **Tissue distribution and metabolization of ciguatoxins in an herbivorous fish following experimental dietary exposure to *Gambierdiscus polynesiensis***

Rachel J. Clausing <sup>1,2\*</sup>, Hela Ben Gharbia <sup>3</sup>, Khalil Sdiri <sup>3</sup>, Manoëlla Sibat <sup>4</sup>, Ma. Llorina Rañada-Mestizo <sup>5</sup>, Laura Lavenu <sup>3</sup>, Philipp Hess <sup>4</sup>, Mireille Chinain <sup>6</sup> and Marie-Yasmine Dechraoui Bottein <sup>7</sup>

<sup>1</sup> Università degli Studi di Genova, Dipartimento di Scienze della Terra, dell'Ambiente e della Vita, 16132, Genova, Italia

<sup>2</sup> Department of Ecology and Evolutionary Biology, University of California, California, Los Angeles, USA

<sup>3</sup> International Atomic Energy Agency, IAEA Marine Environment Laboratories, 4 Quai Antoine 1er, 98000, Monaco, Monaco

<sup>4</sup> Ifremer, ODE/PHYTOX/METALG, Rue de l'île d'Yeu, F-44300 Nantes, France

<sup>5</sup> IAEA Collaborating Center on Harmful Algal Bloom (HAB) Studies, Chemistry Research Section, Philippine Nuclear Research Institute – Department of Science and Technology (DOST-PNRI), Diliman, Quezon City, 1101, Philippines

<sup>6</sup> Institut Louis Malardé- UMR 241 EIO, Laboratoire des Micro-algues Toxiques, BP 30, 98713, Papeete-Tahiti, French Polynesia

<sup>7</sup> Université Côte d'Azur, CNRS, ECOSEAS, UMR7035, Parc Valrose, CEDEX 2, 06103 Nice, France

\* Correspondence: rachel.clausing@gmail.com;

---

**Table S1. Growth of individual fish from each treatment.**

| <b>Fish</b> | <b>Treatment</b> | <b>Initial weight</b> | <b>Final weight</b> | <b>Weight gain</b> | <b>Percent gain</b> |
|-------------|------------------|-----------------------|---------------------|--------------------|---------------------|
| 1           | control          | 44.2                  | 62.5                | 18.4               | 41.6                |
| 2           | control          | 30.9                  | 52.8                | 22.0               | 71.2                |
| 3           | experimental     | 36.2                  | 54.9                | 18.7               | 51.6                |
| 4           | experimental     | 23.4                  | 47.9                | 24.5               | 105.0               |
| 5           | control          | 45.2                  | 61.8                | 16.6               | 36.8                |
| 6           | control          | 28.9                  | 59.7                | 30.8               | 106.7               |
| 7           | experimental     | 36.2                  | 58.7                | 22.5               | 62.2                |
| 8           | experimental     | 32.3                  | 57.1                | 24.8               | 76.8                |
| 9           | control          | 47.1                  | 53.7                | 6.6                | 14.1                |
| 10          | control          | 25.7                  | 48.9                | 23.2               | 90.3                |
| 11          | experimental     | 38.0                  | 73.8                | 35.8               | 94.4                |
| 12          | experimental     | 31.0                  | 54.3                | 23.3               | 75.0                |

**Table S2.** Results of Tukeys HSD post-hoc testing comparing toxin concentrations among tissue types for r-RBA and CBA-N2A.

| Tissue 1    | Tissue 2        | RBA assay |             |             |                             | N2a-CBA assay |             |             |                             |
|-------------|-----------------|-----------|-------------|-------------|-----------------------------|---------------|-------------|-------------|-----------------------------|
|             |                 | estimate  | lower<br>CI | upper<br>CI | adjusted<br><i>p</i> -value | estimate      | lower<br>CI | upper<br>CI | adjusted<br><i>p</i> -value |
| remnants    | <b>spleen</b>   | 95.1      | 86.9        | 103         | <b>2.33E-14</b>             | 127.8         | 90.1        | 165.4       | <b>6.50E-08</b>             |
| muscle      | <b>spleen</b>   | 94        | 85.4        | 103         | <b>2.33E-14</b>             | 119.9         | 82.2        | 157.5       | <b>1.61E-07</b>             |
| liver       | <b>spleen</b>   | 80        | 71.3        | 88.6        | <b>2.33E-14</b>             | 101.6         | 63.9        | 139.2       | <b>1.60E-06</b>             |
| gills       | <b>spleen</b>   | 91.6      | 83          | 100         | <b>2.33E-14</b>             | 125.7         | 88.1        | 163.4       | <b>8.20E-08</b>             |
| GI          | <b>spleen</b>   | 88.2      | 78.5        | 97.8        | <b>2.33E-14</b>             | 118.2         | 80.5        | 155.8       | <b>1.98E-07</b>             |
| gallbladder | <b>spleen</b>   |           |             |             |                             | 128.4         | 90.7        | 166.0       | <b>6.09E-08</b>             |
| eyes        | <b>spleen</b>   |           |             |             |                             | 127.5         | 89.9        | 165.2       | <b>6.68E-08</b>             |
| brain       | <b>spleen</b>   |           |             |             |                             | 127.8         | 90.1        | 165.4       | <b>6.50E-08</b>             |
| muscle      | remnants        | -1.07     | -7.99       | 5.85        | 0.996                       |               |             |             |                             |
| liver       | <b>remnants</b> | -15.1     | -22         | -8.2        | <b>&lt;0.001</b>            |               |             |             |                             |
| gills       | remnants        | -3.47     | -10.4       | 3.46        | 0.631                       |               |             |             |                             |
| GI          | remnants        | -6.9      | -15.1       | 1.26        | 0.130                       |               |             |             |                             |
| liver       | <b>muscle</b>   | -14       | -21.5       | -6.57       | <b>&lt;0.001</b>            | -18.3         | -55.9       | 19.4        | 0.70                        |
| gills       | muscle          | -2.4      | -9.87       | 5.08        | 0.914                       | 5.8           | -31.8       | 43.5        | 1.00                        |
| GI          | muscle          | -5.83     | -14.5       | 2.8         | 0.322                       | -1.7          | -39.4       | 35.9        | 1.00                        |
| gallbladder | muscle          |           |             |             |                             | 8.5           | -29.2       | 46.1        | 0.99                        |
| eyes        | muscle          |           |             |             |                             | 7.7           | -30.0       | 45.3        | 1.00                        |
| brain       | muscle          |           |             |             |                             | 7.9           | -29.7       | 45.6        | 1.00                        |
| gills       | <b>liver</b>    | 11.7      | 4.18        | 19.1        | <b>0.0009</b>               | 24.1          | -13.5       | 61.8        | 0.39                        |
| GI          | liver           | 8.22      | -0.415      | 16.9        | 0.068                       | 16.6          | -21.1       | 54.2        | 0.79                        |
| gallbladder | liver           |           |             |             |                             | 26.8          | -10.9       | 64.4        | 0.28                        |
| eyes        | liver           |           |             |             |                             | 25.9          | -11.7       | 63.6        | 0.31                        |
| brain       | liver           |           |             |             |                             | 26.2          | -11.5       | 63.8        | 0.30                        |
| GI          | gills           | -3.43     | -12.1       | 5.2         | 0.813                       | -7.6          | -45.2       | 30.1        | 1.00                        |
| gallbladder | gills           |           |             |             |                             | 2.6           | -35.0       | 40.3        | 1.00                        |
| eyes        | gills           |           |             |             |                             | 1.8           | -35.8       | 39.5        | 1.00                        |
| brain       | gills           |           |             |             |                             | 2.1           | -35.6       | 39.7        | 1.00                        |
| gallbladder | GI              |           |             |             |                             | 10.2          | -27.5       | 47.9        | 0.98                        |
| eyes        | GI              |           |             |             |                             | 9.4           | -28.3       | 47.0        | 0.99                        |
| brain       | GI              |           |             |             |                             | 9.6           | -28.0       | 47.3        | 0.98                        |
| eyes        | gallbladder     |           |             |             |                             | -0.8          | -38.5       | 36.8        | 1.00                        |
| brain       | gallbladder     |           |             |             |                             | -0.6          | -38.2       | 37.1        | 1.00                        |
| brain       | eyes            |           |             |             |                             | 0.2           | -37.4       | 37.9        | 1.00                        |

**Table S3.** Calculation of estimated toxin concentration in remaining parts by N2A. A) Tissue:remaining parts ratio of toxin concentration as calculated by RBA for each tissue type. B) Estimated tissue:remaining parts ratio for N2A. C) Calculation of remaining parts by N2A, assuming a constant ratio between each tissue type and the measure of remaining parts between the two methods of analysis. D) A final estimate of the toxin concentration of remaining parts by N2A (mean  $\pm$  SD) is reached by averaging values obtained for each tissue type (C).

| <b>Tissue</b>                   | <b>ratio</b>     | <b>toxin ‰</b> | <b>toxin ‰</b> | <b>(C) est. carcass</b>               |   |
|---------------------------------|------------------|----------------|----------------|---------------------------------------|---|
|                                 | <b>(A) = (B)</b> | <b>r-RBA</b>   | <b>CBA-N2a</b> | <b>By CBA-N2a</b>                     |   |
| spleen                          | 33.05            | 98.06          | 129.01         | 3.90                                  | * |
| muscle                          | 1.36             | 2.97           | 9.13           | 6.71                                  |   |
| liver                           | 6.10             | 4.04           | 27.41          | 4.50                                  |   |
| gills                           | 2.17             | 18.09          | 3.29           | 1.52                                  |   |
| GI                              | 3.33             | 6.43           | 10.85          | 3.26                                  |   |
| <b>mean <math>\pm</math> SD</b> |                  |                |                | <b>3.98 <math>\pm</math> 1.89 (D)</b> |   |

$$(A) \frac{TissueX_{RBA}}{Remaining\ parts_{RBA}} = \frac{TissueX_{N2A}}{Remaining\ parts_{N2A}} \quad (B)$$

(1)

$$(C) \text{ Remaining parts}_{N2A} = TissueX_{N2A} \times \frac{Remaining\ parts_{RBA}}{TissueX_{RBA}}$$

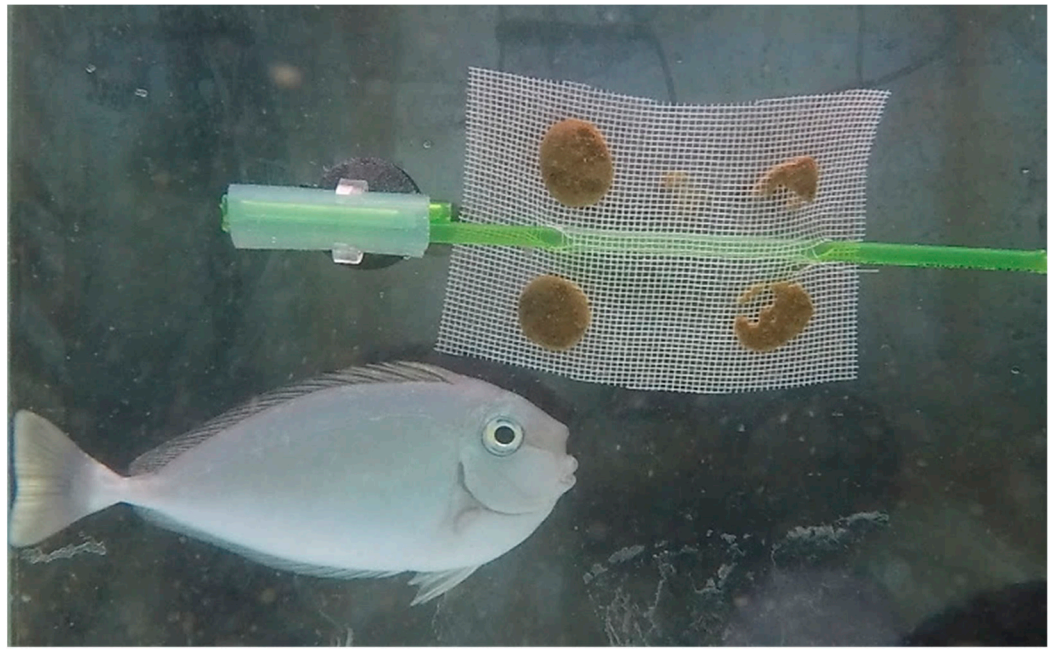

**Figure S1.** Experimental model for exposure to toxic microalgal cells: herbivorous fish graze on a gelatin-based food containing *Gambierdiscus* cells, solidified on a nylon mesh and attached to the aquarium wall with a plastic rod.

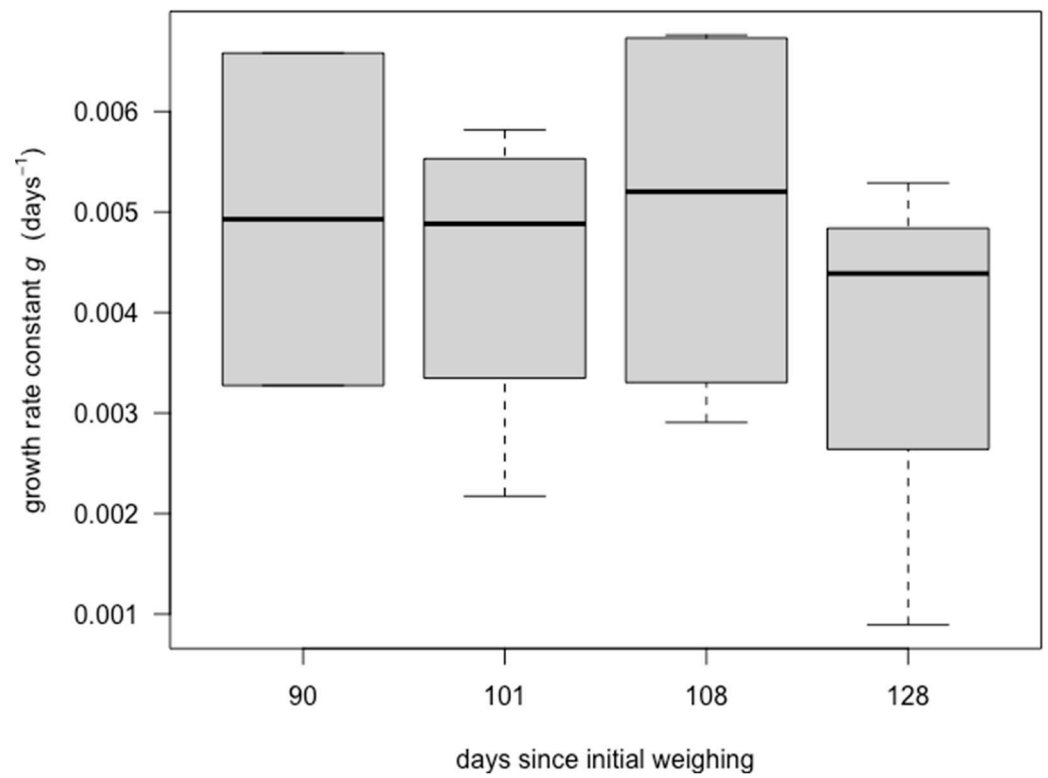

**Figure S2.** Comparison of growth rate constants ( $g$ ) over time (following  $\ln W_t = \ln W_{t-i} + gt$ ) where the x-axis is the date at which the growth rate was calculated for replicate individual fish (>3 weighing events for each fish). Each bar represents different replicate fish, with no overlap. The lack of significant differences over time validates the use of growth curves constructed with a subset of fish at points throughout the experiment to adjust the quantity of gel food offered with the goal of maintaining a constant toxin consumption rate.

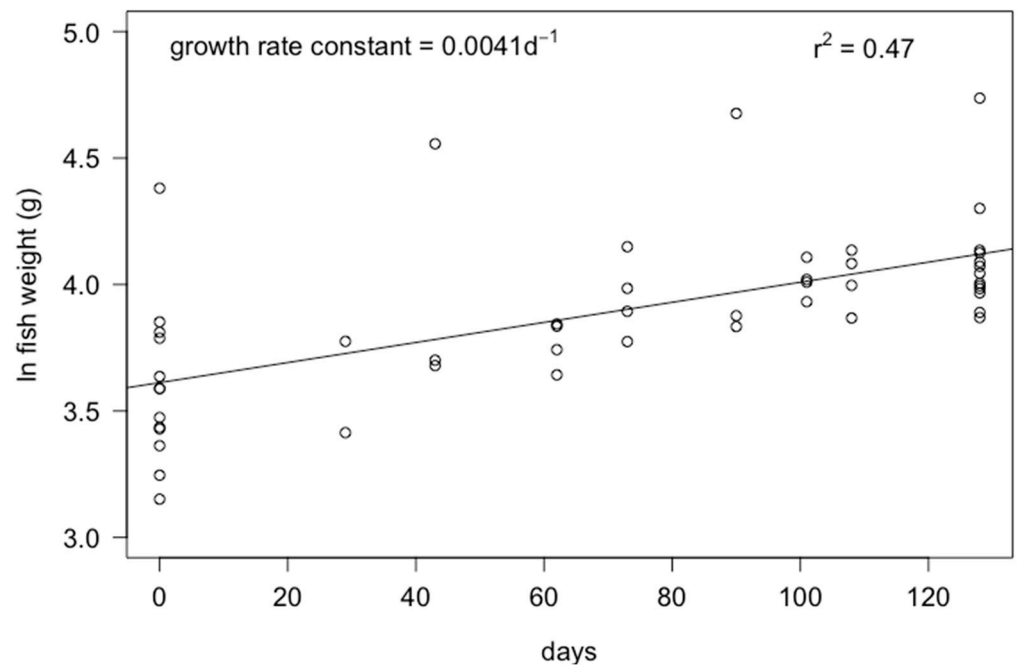

**Figure S3.** Linear regression of overall fish growth over time, from weight prior to tank distribution until sampling. The growth rate constant,  $g = 0.0041 \text{ d}^{-1}$  is estimated by the slope of the curve fitted to  $\ln W$ , the measured fish weights. Linear regression  $p < 0.001$ ,  $R^2 = 0.47$ .

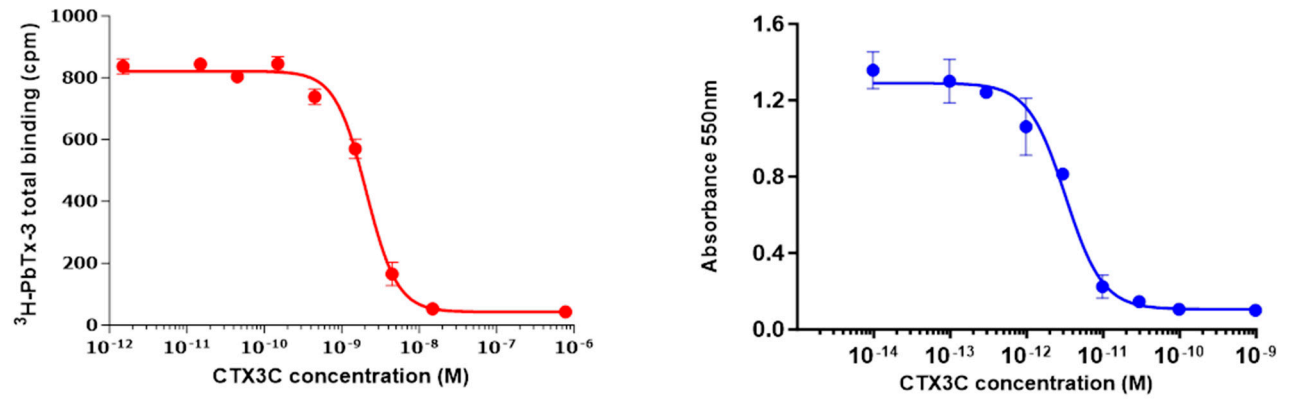

**Figure S4.** Sigmoidal standard curves of (a) PbTx3, obtained by radioligand-receptor binding assay (r-RBA) and (b) CTX3C, obtained by neuroblastoma cell-based assay (CBA-N2a).



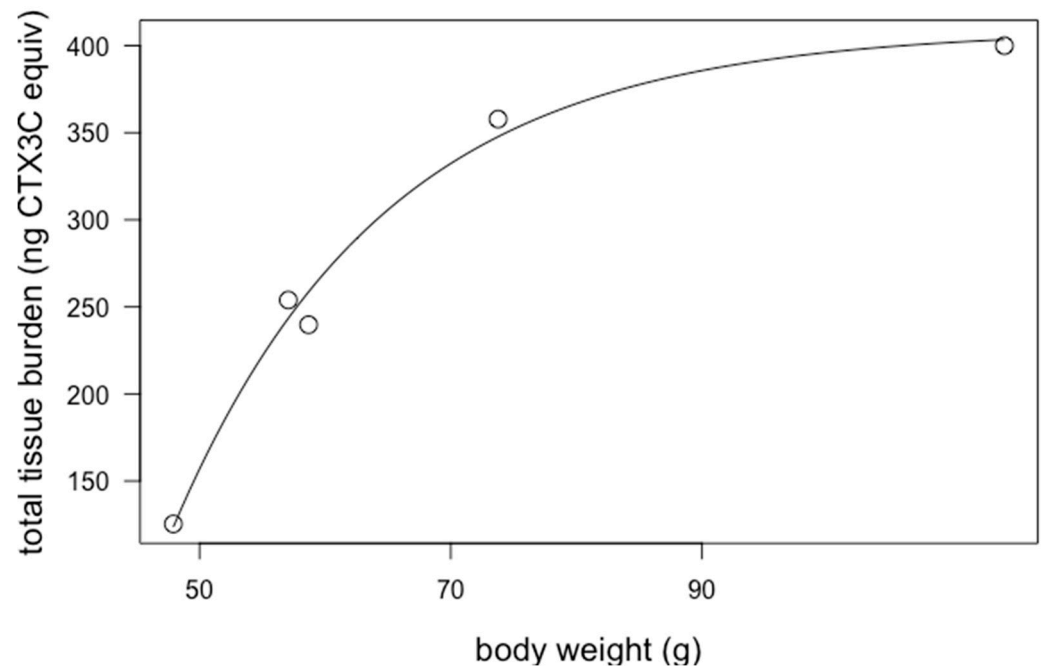

**Figure S5.** Total CTX body burden as a function of body weight at time of sampling. Toxin analysis by r-RBA. Data fit with an asymptotic regression.

**Table S4.** Model summary of asymptotic regression of total fish CTX body burden as a function of body mass (**Figure S4**).

| parameter           | estimate | SE   | t-value | p-value |
|---------------------|----------|------|---------|---------|
| init:(Intercept)    | -4530    | 2490 | -1.82   | 0.210   |
| m:(Intercept)       | 0.06     | 0.01 | 5.56    | 0.031   |
| plateau:(Intercept) | 409      | 18.7 | 21.9    | 0.002   |

**Table S5:** The selected  $m/z$  transitions and the LC-MS/MS instrument parameters used for the scheduled MRM method

| Compound                                           | Detection<br>window (min) | Precursor<br>ion (Q1) $m/z$              | Product<br>ion (Q3) $m/z$ | DP (eV) | CE<br>(eV) | CXP<br>(eV) |
|----------------------------------------------------|---------------------------|------------------------------------------|---------------------------|---------|------------|-------------|
| CTX1B                                              | $3.1 \pm 1$               | 1128.6 [M+NH <sub>4</sub> ] <sup>+</sup> | 1093.6                    | 105     | 20         | 12          |
|                                                    |                           |                                          | 1075.6                    | 105     | 30         | 12          |
|                                                    |                           |                                          | 95.1                      | 105     | 90         | 20          |
| M- <i>seco</i> -CTX3C                              | $4.7 \pm 1$               | 1041.6 [M+H] <sup>+</sup>                | 1023.6                    | 105     | 30         | 12          |
|                                                    |                           |                                          | 1005.6                    | 105     | 20         | 12          |
|                                                    |                           |                                          | 125.1                     | 105     | 50         | 18          |
| 2-OHCTX3C and<br>3-OHCTX3C                         | $5.4 \pm 1$               | 1058.6 [M+NH <sub>4</sub> ] <sup>+</sup> | 1023.6                    | 105     | 30         | 12          |
|                                                    |                           |                                          | 1005.6                    | 105     | 20         | 12          |
|                                                    |                           |                                          | 125.1                     | 105     | 50         | 18          |
| 2,3-diOHCTX3C                                      | $6.0 \pm 1$               | 1074.6 [M+NH <sub>4</sub> ] <sup>+</sup> | 1039.6                    | 105     | 30         | 12          |
|                                                    |                           |                                          | 1057.6 [M+H] <sup>+</sup> | 105     | 20         | 12          |
|                                                    |                           |                                          | 125.1                     | 105     | 50         | 18          |
| 51-OHCTX3C                                         | $6.3 \pm 1$               | 1056.6 [M+NH <sub>4</sub> ] <sup>+</sup> | 1021.6                    | 105     | 30         | 12          |
|                                                    |                           |                                          | 1039.6 [M+H] <sup>+</sup> | 105     | 20         | 12          |
|                                                    |                           |                                          | 1003.6                    | 105     | 20         | 12          |
| M- <i>seco</i> -CTX4A/4B                           | $6.5 \pm 1$               | 1096.6 [M+NH <sub>4</sub> ] <sup>+</sup> | 1043.7                    | 105     | 30         | 12          |
|                                                    |                           |                                          | 1079.6 [M+H] <sup>+</sup> | 105     | 20         | 12          |
|                                                    |                           |                                          | 125.1                     | 105     | 50         | 18          |
| 52- <i>epi</i> -54-deoxyCTX1B<br>and 54-deoxyCTX1B | $6.8 \pm 1$               | 1112.6 [M+NH <sub>4</sub> ] <sup>+</sup> | 1077.6                    | 105     | 20         | 12          |
|                                                    |                           |                                          | 1059.6                    | 105     | 30         | 12          |
|                                                    |                           |                                          | 95.1                      | 105     | 90         | 20          |
| CTX3C isomers (1), (2) and<br>(3)                  | $7.6 \pm 1$               | 1040.6 [M+NH <sub>4</sub> ] <sup>+</sup> | 1005.6                    | 105     | 30         | 12          |
|                                                    |                           |                                          | 1023.6 [M+H] <sup>+</sup> | 105     | 20         | 12          |
|                                                    |                           |                                          | 125.1                     | 105     | 20         | 12          |
| CTX3C, 49- <i>epi</i> CTX3C and<br>isomer (4)      | $10.5 \pm 1$              | 1040.6 [M+NH <sub>4</sub> ] <sup>+</sup> | 1005.6                    | 105     | 30         | 12          |
|                                                    |                           |                                          | 1023.6 [M+H] <sup>+</sup> | 105     | 20         | 12          |
|                                                    |                           |                                          | 125.1                     | 105     | 50         | 18          |
| CTX4A and CTX4B                                    | $12.2 \pm 1$              | 1078.6 [M+NH <sub>4</sub> ] <sup>+</sup> | 1043.6                    | 105     | 30         | 12          |
|                                                    |                           |                                          | 1061.6 [M+H] <sup>+</sup> | 105     | 20         | 12          |
|                                                    |                           |                                          | 125.1                     | 105     | 50         | 18          |
